# Supplementary material for: The combination of genomic offset and niche modelling provides insights into climate change-driven vulnerability
Source: Springer Nature journal article supplement (doi:10.1038/s41467-022-32546-z), 2022-08-16
Supplement: 41467_2022_32546_MOESM1_ESM.pdf [file 41467_2022_32546_MOESM1_ESM.pdf]

## Supplementary Information

The combination of genomic offset and niche modelling provides insights into climate change-driven vulnerability

Chen et al.

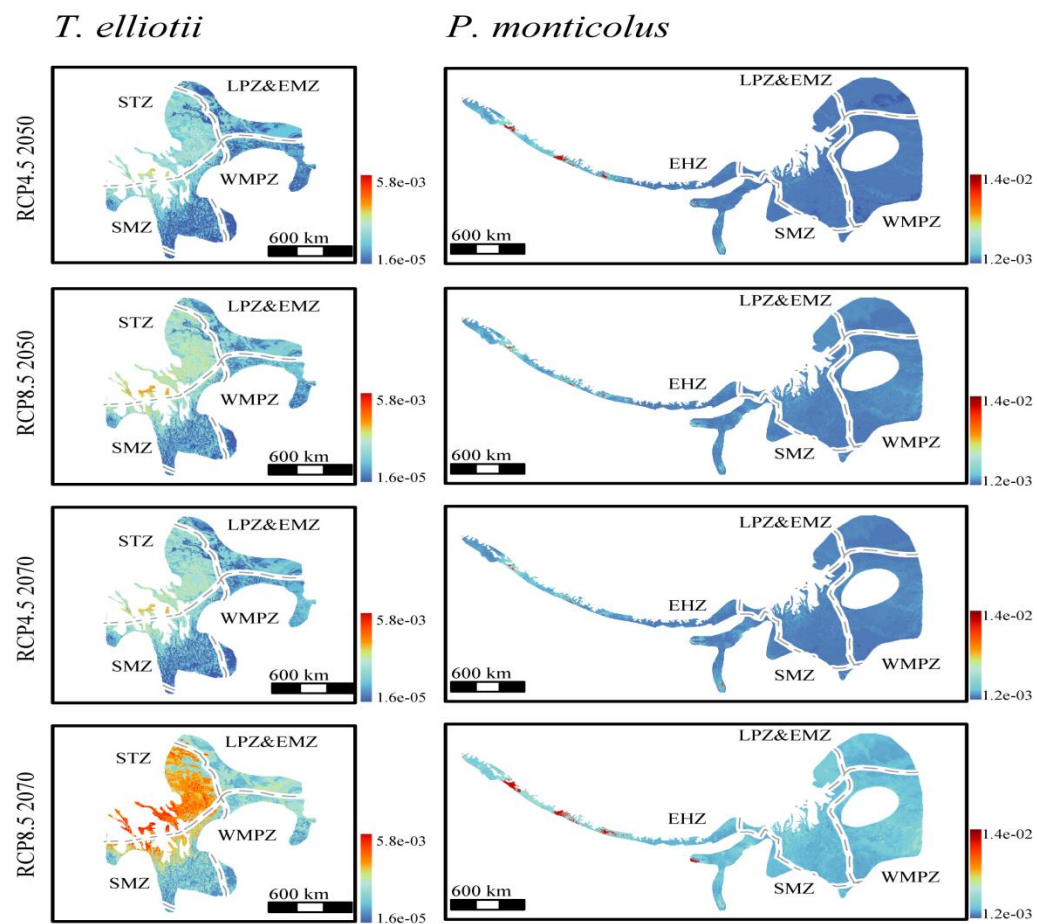

Supplementary Fig. 1. Genomic offsets to the future climate change. Left, *T. elliotii*; right, *P. monticolus*. For the future climate projections, we used moderate scenario (representative concentration pathway, RCP 4.5W/M<sup>2</sup>) and the worst scenario (RCP 8.5 W/M<sup>2</sup>) of greenhouse gas emission trajectories at the 2050 and 2070 horizons, respectively. These results suggest a magnitude-dependent genomic offset.

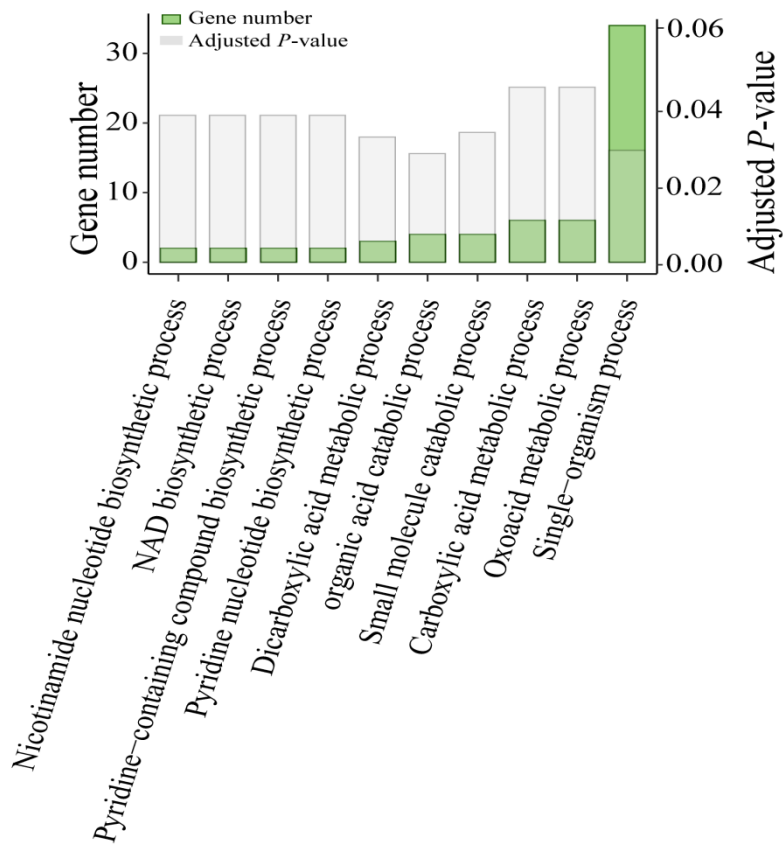

## Term

Supplementary Fig. 2. The SNPs significantly associated with the top climatic variables are enriched in the genes that are functionally related to the catalytic and metabolic processes. Only result from *P. monticolus* is shown, as 23 genes identified in *T. elliotii* did not enrich any significant GO term or pathway after multiple correction of *P* value.

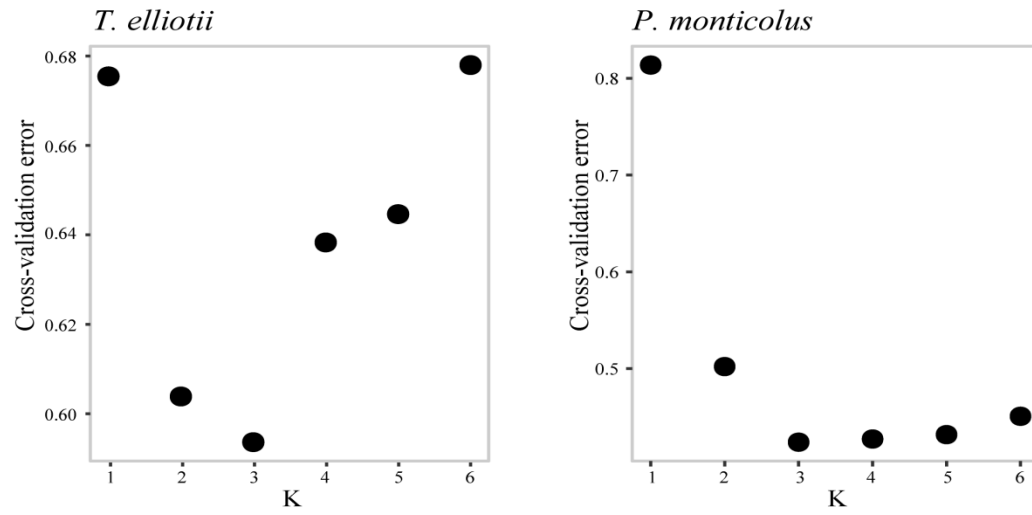

Supplementary Fig. 3. Cross-validation error for the coancestry cluster between 1 and 6 in Admixture 1.3. The optimal cluster ( $K=3$ ) was identified by the smallest cross-validation error.

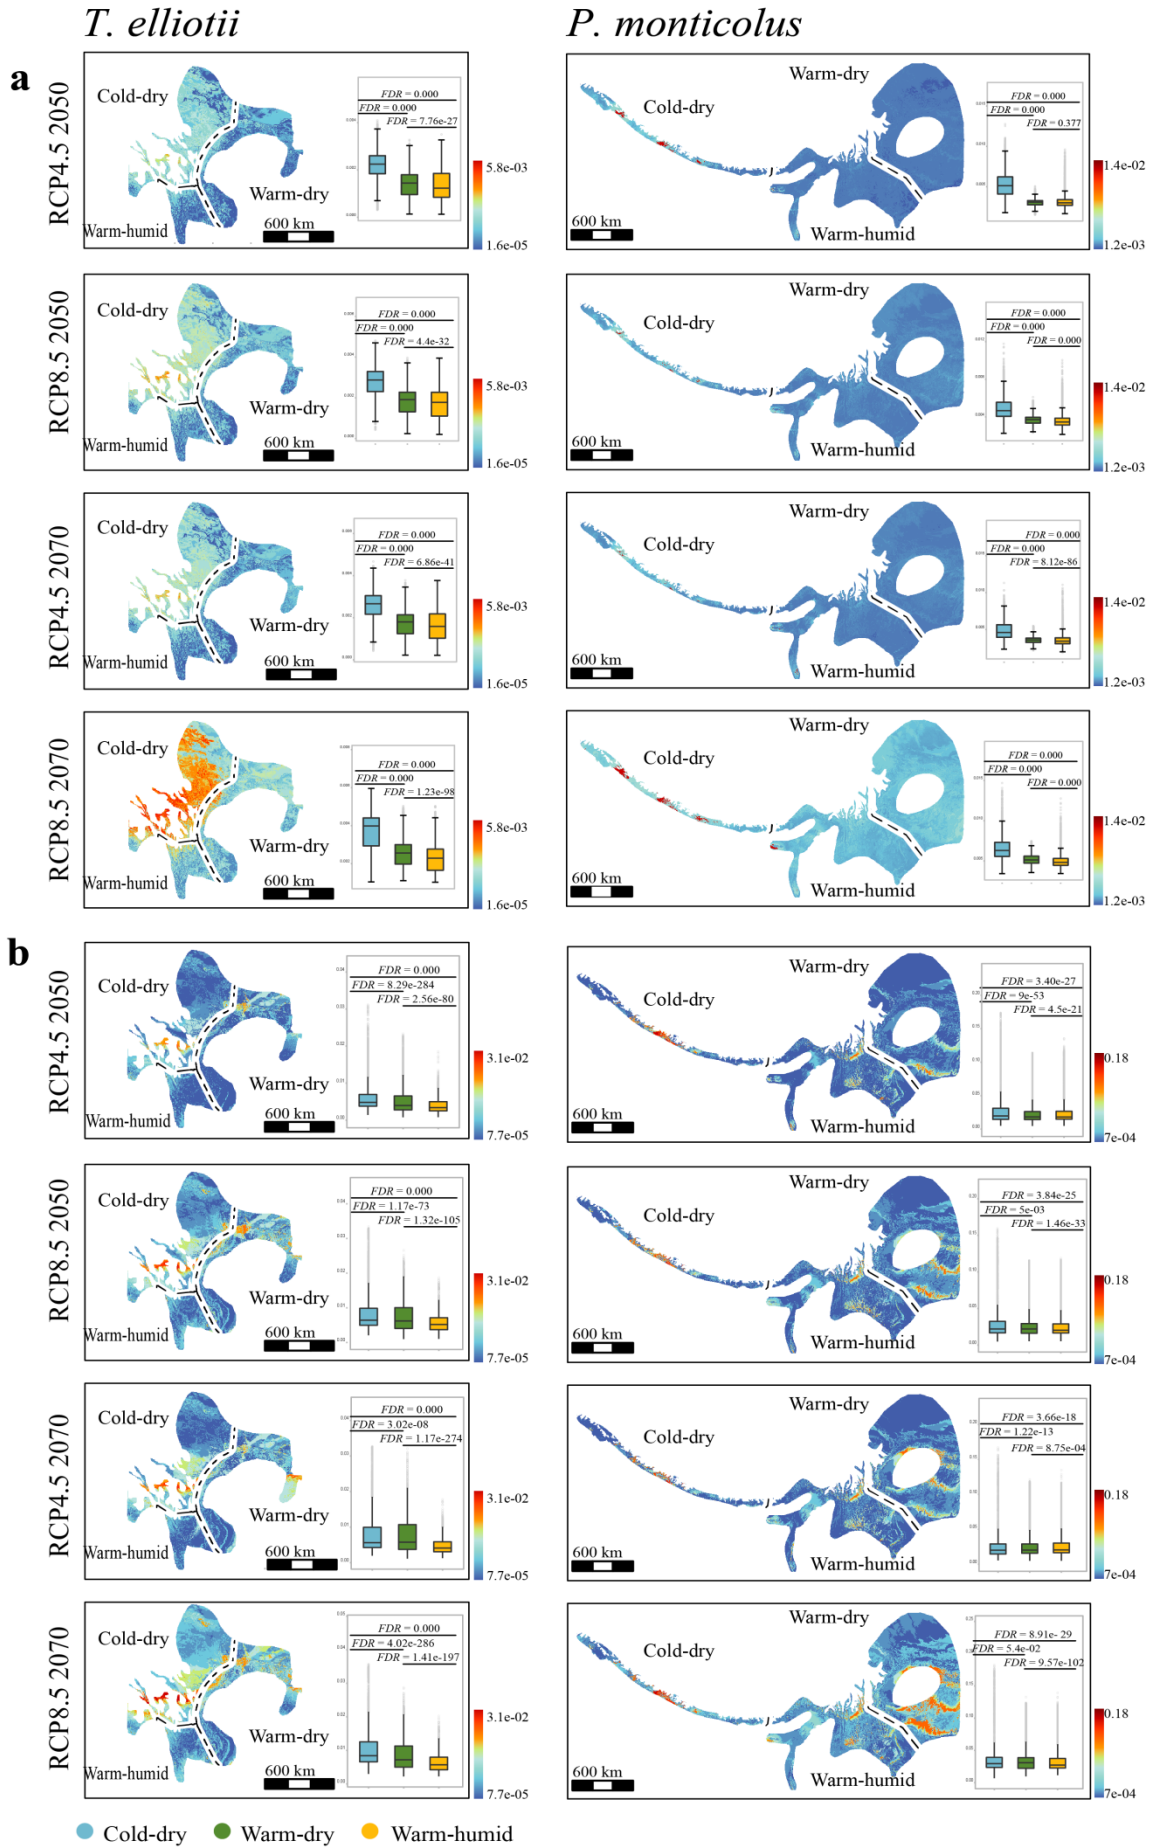

Supplementary Fig. 4. GradientForest predicted genomic offsets under different future climatic conditions (RCP4.5 2050, RCP8.5 2050, RCP4.5 2070 and PCP8.5 2070) in the *T. elliotii* and *P. monticolus*. (a)  $R^2$  positive SNPs, (b) outlier SNPs. Inset, the cold-dry tolerant groups (*T. elliotii*,  $n=21,402$  grids; *P. monticolus*,  $n=6,926$  grids) show greater genomic offsets than the warm-humid (*T. elliotii*,  $n=7,061$  grids; *P. monticolus*,  $n=30,336$  grids) and warm-dry tolerant groups (*T. elliotii*,  $n=15,416$  grids; *P. monticolus*,  $n=42,929$  grids) in *T. elliotii* (left) and *P. monticolus* (right). We tested genomic offsets among these groups using the two-tailed Wilcoxon rank sum test and FDR correction for multiple comparisons. Note that spatial scales of the Y axis (genomic offsets) for the  $R^2$  positive SNPs (a) differ from those for the outlier SNPs (b). The box plots show the median (center line) and 25<sup>th</sup>-75<sup>th</sup> percentiles (box limits). The whiskers extend to the top/bottom to the maxima and minima. Data beyond the end of the whiskers are considered outliers.

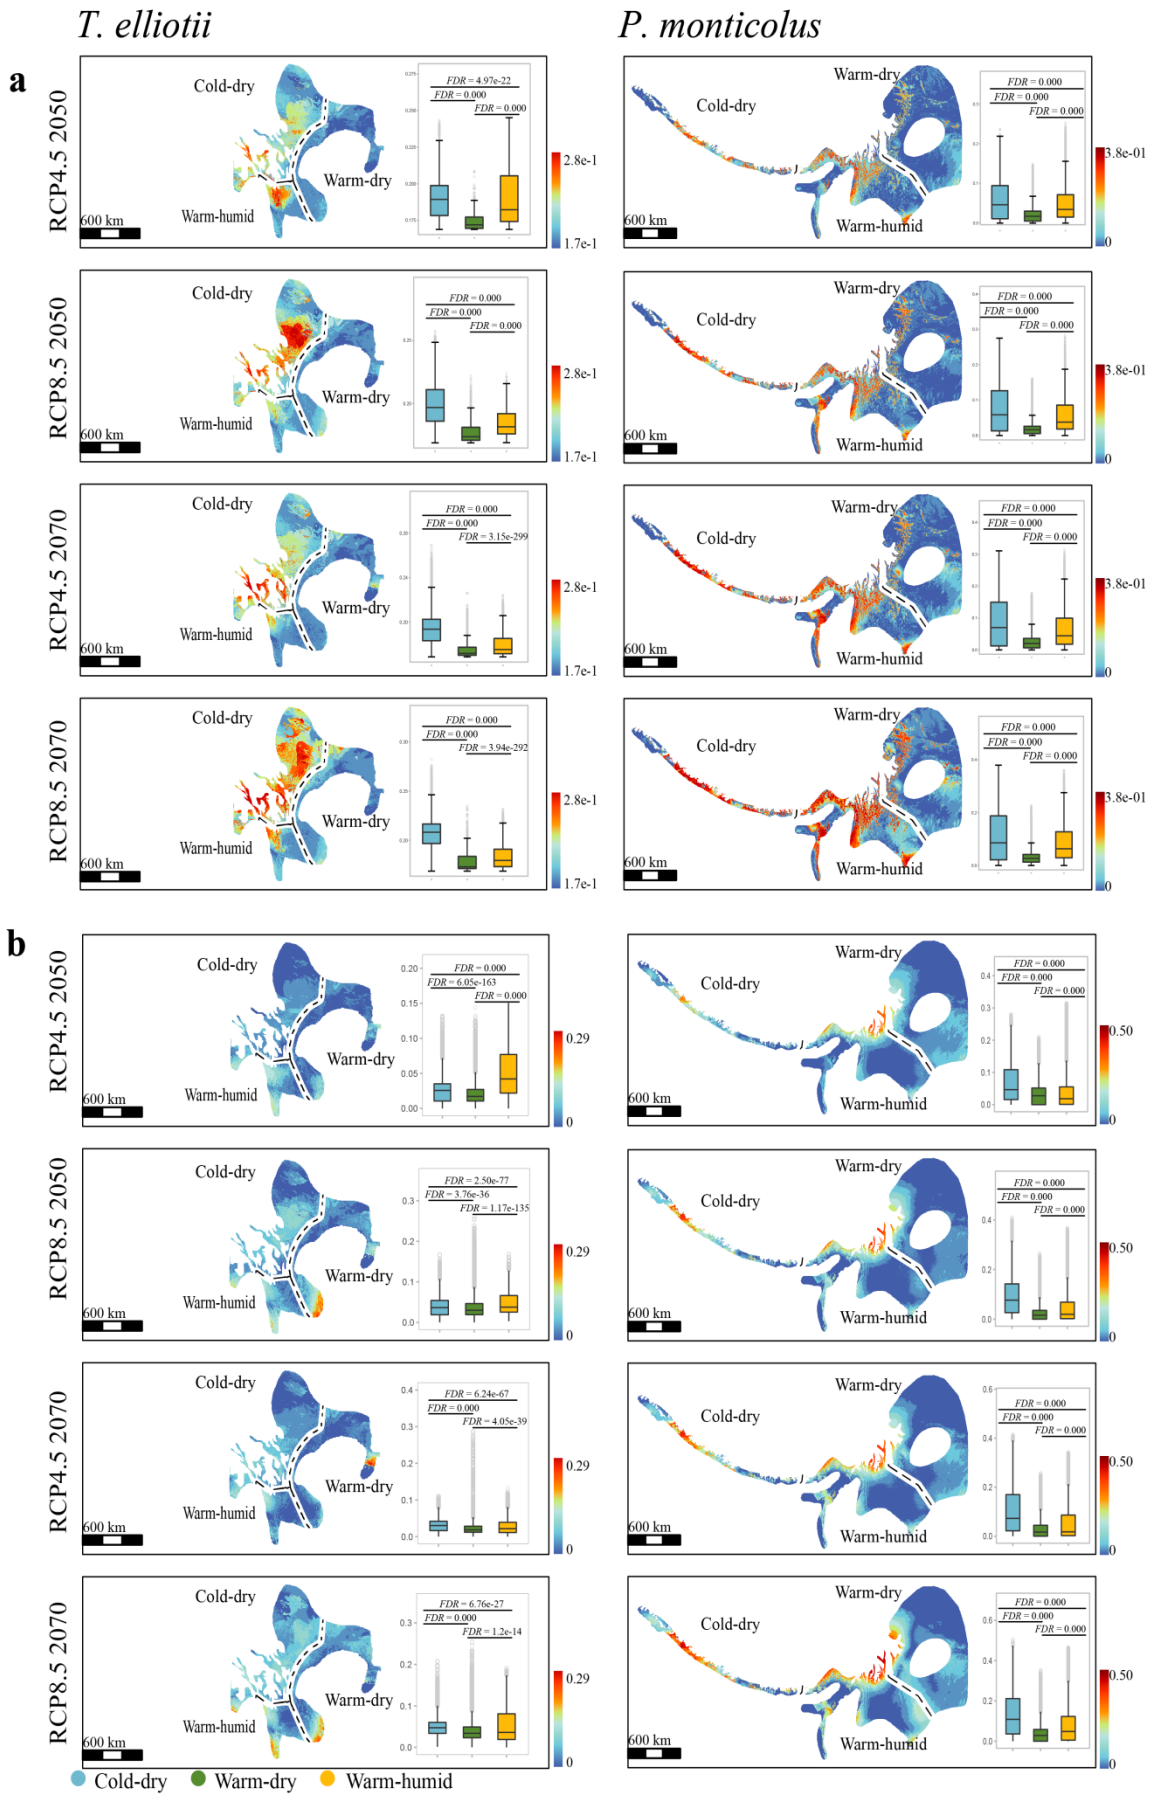

Supplementary Fig. 5. Genomic offset analysis using generalized dissimilarity modelling (GDM). The predicted genomic offsets to future climatic conditions (RCP4.5 2050, RCP8.5 2050, RCP4.5 2070 and RCP8.5 2070). (a)  $R^2$  positive SNPs, (b) outlier SNPs. Inset, the cold-dry tolerant groups (*T. elliotii*,  $n=21,402$  grids; *P. monticolus*,  $n=6,926$  grids) show greater genomic offsets than the warm-humid (*T. elliotii*,  $n=7,061$  grids; *P. monticolus*,  $n=30,336$  grids) and warm-dry tolerant groups (*T. elliotii*,  $n=15,416$  grids; *P. monticolus*,  $n=42,929$  grids) in *T. elliotii* (left) and *P. monticolus* (right). We tested genomic offsets among these groups using the two-tailed Wilcoxon rank sum test and FDR correction for multiple comparisons. Note that spatial scales of the Y axis (genomic offsets) for the  $R^2$  positive SNPs (a) differ from those for the outlier SNPs (b). The box plots show the median (center line) and 25<sup>th</sup>-75<sup>th</sup> percentiles (box limits). The whiskers extend to the top/bottom to the maxima and minima. Data beyond the end of the whiskers are considered outliers.



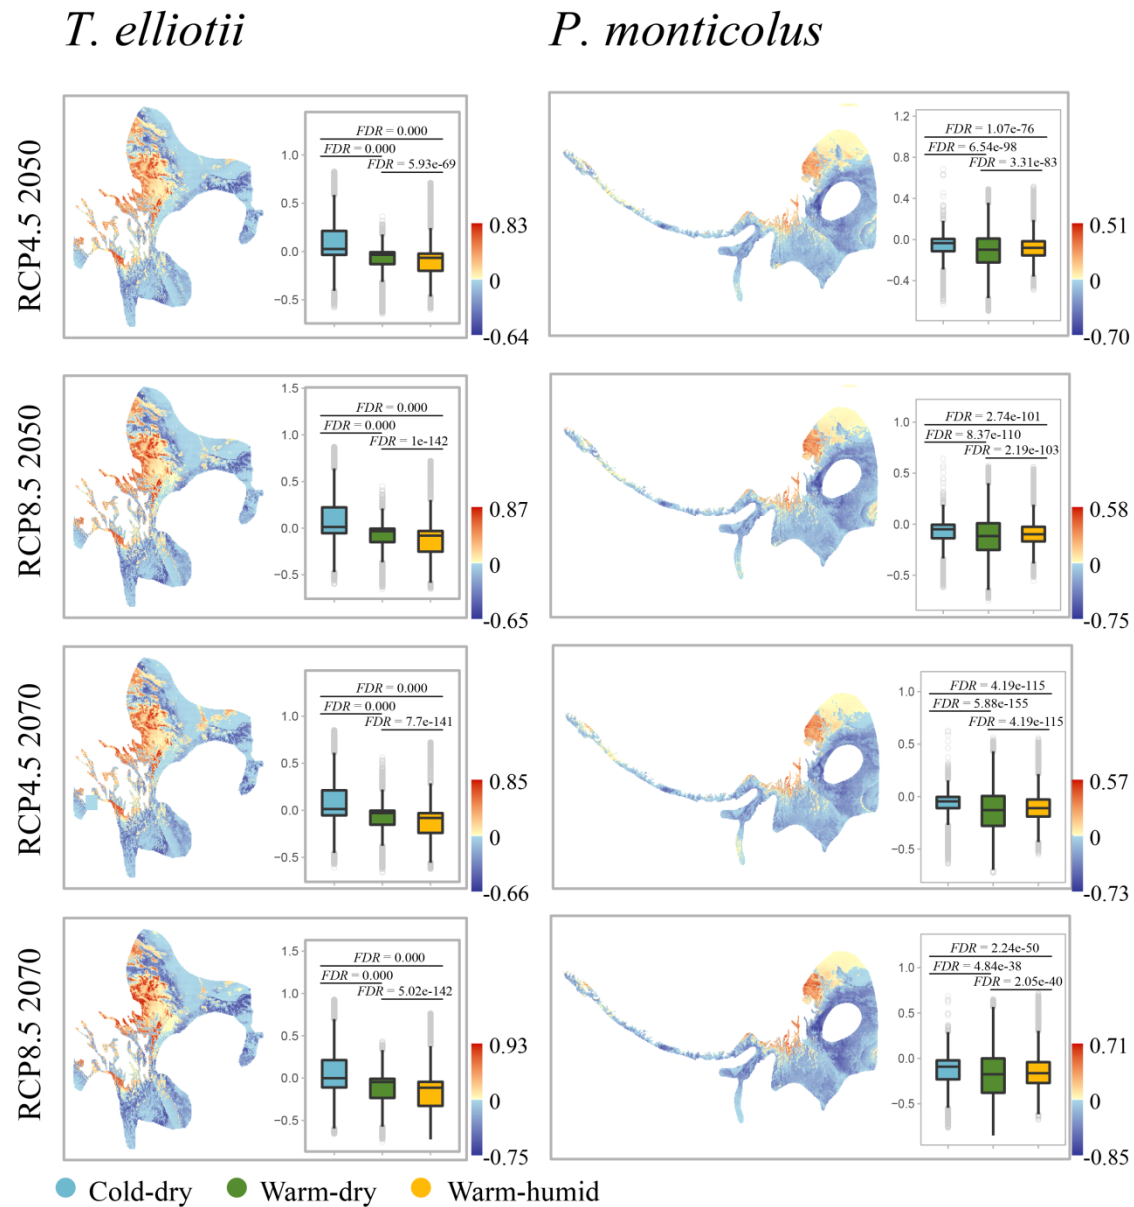

Supplementary Fig. 6. Niche suitability change between current and future climate (RCP4.5 2050, RCP8.5 2050, RCP4.5 2070 and RCP8.5 2070). The reddish colours show areas with increasing niche suitability ( $>0$ ) and blue colours show the areas with decreasing niche suitability ( $<0$ ). Inset, the warm-humid (*T. elliotii*,  $n=7,061$  grids; *P. monticolus*,  $n=30,336$  grids) and warm-dry tolerant groups (*T. elliotii*,  $n=15,416$  grids; *P. monticolus*,  $n=42,929$  grids) are under the severer challenge for niche suitability decline than are the cold-dry tolerant groups (*T. elliotii*,  $n=21,402$  grids; *P. monticolus*,  $n=6,926$  grids). We tested niche suitability change among these groups using the two-tailed Wilcoxon rank sum test and FDR correction for multiple comparisons. The box plots show the median (center line) and 25<sup>th</sup>-75<sup>th</sup> percentiles (box limits). The whiskers extend to the top/bottom to the maxima and minima. Data beyond the end of the whiskers are considered outliers. Left, *T. elliotii*; right, *P. monticolus*.

*T. elliotii*

*P. monticolus*

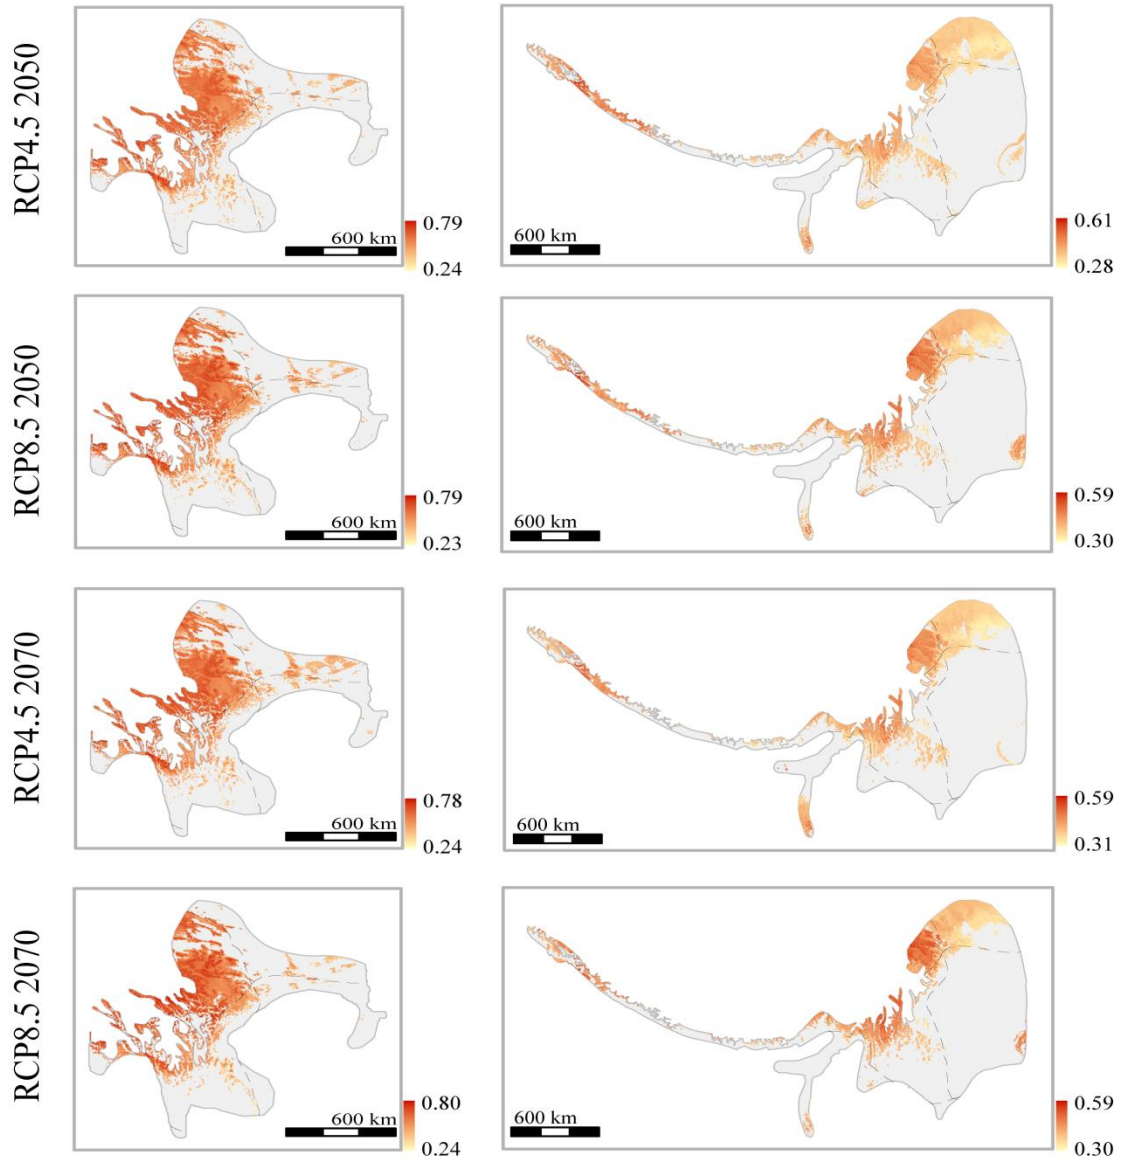

Supplementary Fig. 7. Projection of genome-niche index based on the combined estimate of genomic offset and niche suitability change under different future climate conditions (RCP4.5 2050, RCP8.5 2050, RCP4.5 2070 and RCP8.5 2070). Left, *T. elliotii*, right, *P. monticolus*. After ABC algorithm converged, we obtained optimal estimates of  $nsc$   $\alpha=0.558771$  for *T. elliotii* and  $\alpha=0.60792$  for *P. monticolus* under RCP4.5 2050,  $\alpha=0.52725$  for *T. elliotii* and  $\alpha=0.617253$  for *P. monticolus* under RCP8.5 2050,  $\alpha=0.548771$  for *T. elliotii* and  $\alpha=0.622739$  for *P. monticolus* under RCP4.5 2070, and  $\alpha=0.531756$  for *T. elliotii* and  $\alpha=0.627792$  for *P. monticolus* under RCP8.5 2070.

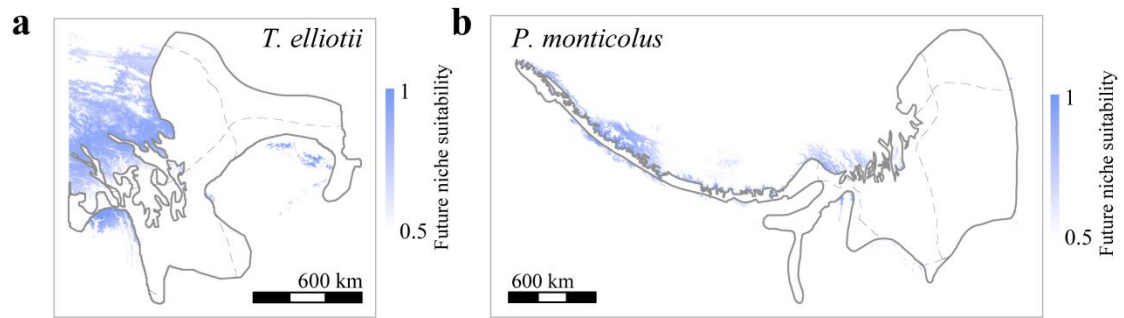

Supplementary Fig. 8. The potential niches expand out of the current distribution ranges of the two species. The large areas of the niches expanded (blue shade) for the cold-dry tolerant populations, but few for the warm-humid tolerant and warm-dry tolerant groups. Only the projection from RCP8.5 2050 is shown, as those projections under other future climatic conditions (RCP4.5 2050, RCP4.5 2070 and RCP8.5 2070) show similar results.

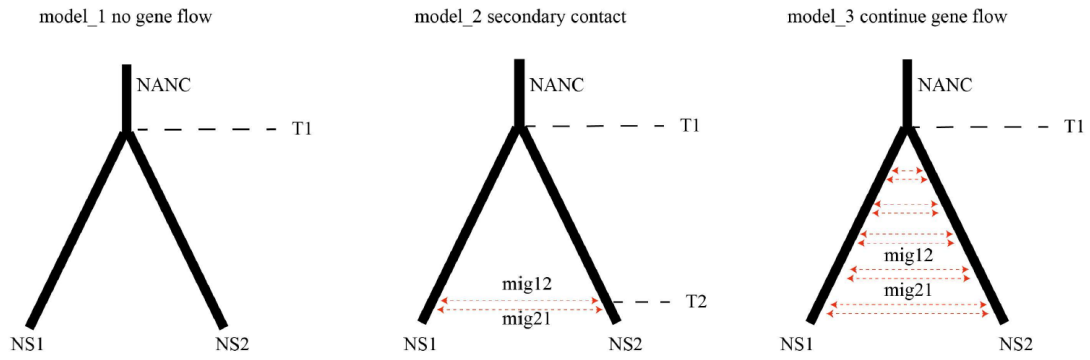

Supplementary Fig. 9. Schematics of the three demographic models testing migration probability between pairs of groups. Horizontal arrows represent the presence of gene flow. NANC, the effective population size of ancestor; NS1, the effective population size of group 1; NS2, the effective population size of group 2; , T1, split time of two groups; T2, the time having secondary gene flow between two groups; mig12 and mig21, migration probability between two groups.

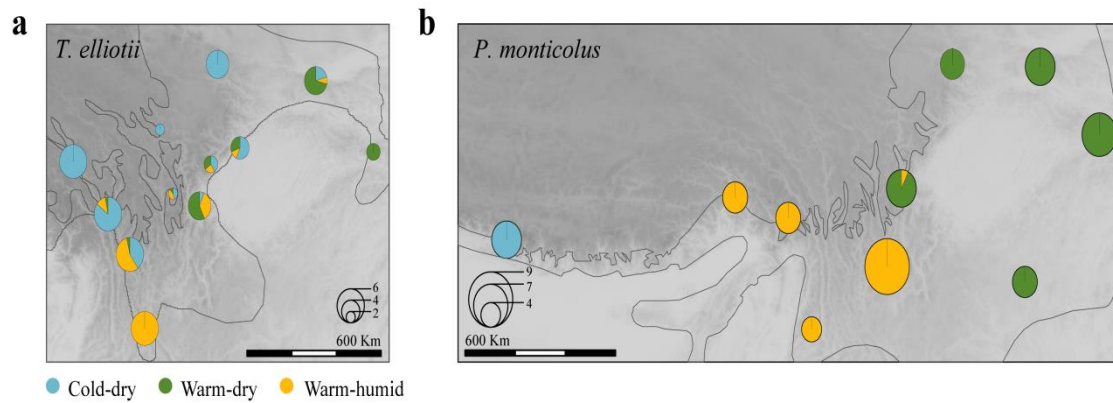

Supplementary Fig. 10. Genetic component distribution of the three groups of *T. elliotii* and *P. monticolus* along the sampling localities, based on the optimal genetic cluster  $K=3$  identified by the smallest cross-validation error. Components of the cold-dry tolerant group (blue), warm-dry tolerant group (green) and warm-humid tolerant group (yellow) in each locality are shown by the pie graph. The bubble size corresponds to sample size. (a) *T. elliotii*, (b) *P. monticolus*.

# *T.elliottii*

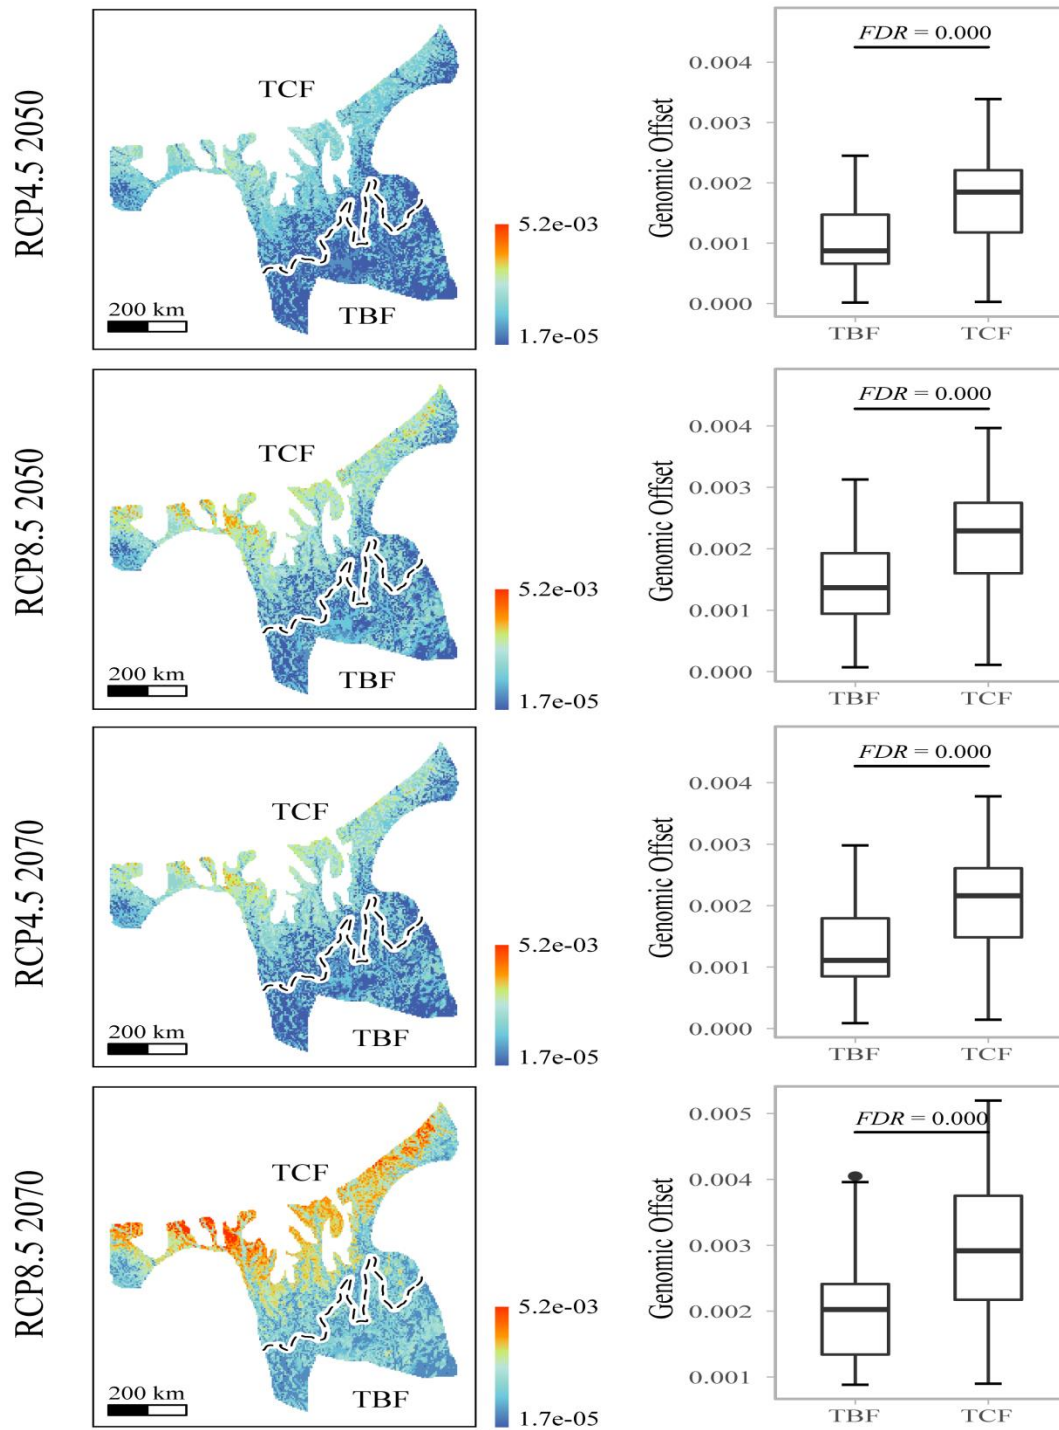

Supplementary Fig. 11. Within the *Southwest mountainous zone*, populations of *T.elliottii* in the temperate coniferous forests (TCF,  $n=9,659$  grids) in the northern part show greater genomic offset than those in the tropical broadleaf forests (TBF,  $n=5,322$  grids, two-tailed Wilcoxon rank sum test,  $P < 0.001$ ) in the southern part. The box plots show the median (center line) and 25<sup>th</sup>-75<sup>th</sup> percentiles (box limits). The whiskers extend to the top/bottom to the maxima and minima. Data beyond the end of the whiskers are considered outliers.

*T. elliotii*

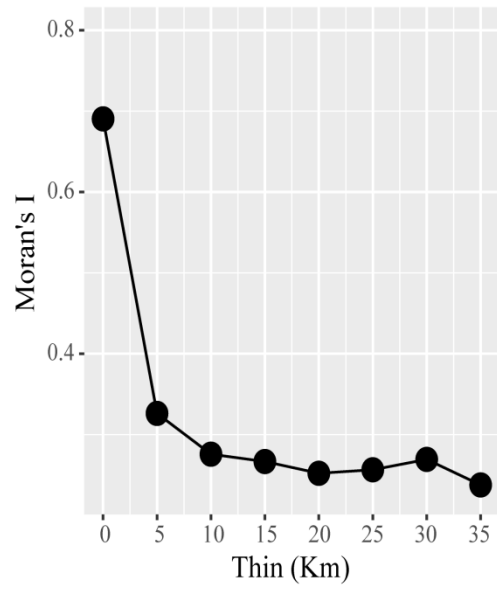

*P. monticolus*

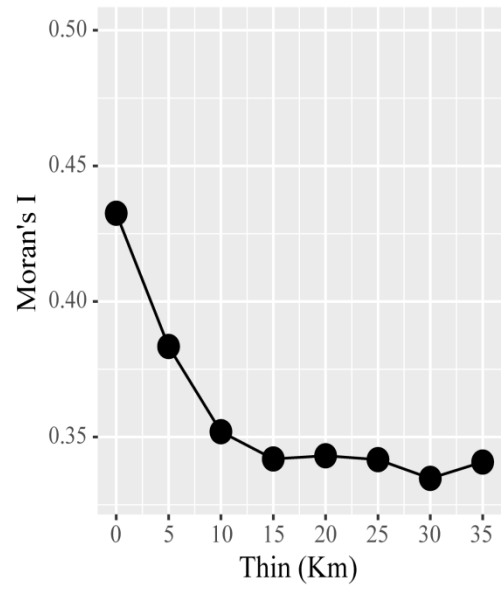

Supplementary Fig. 12. Sampling bias and autocorrelation indicated by Moran's I. Moran's I decreased and reached to a stable level at the approximately 10-km and 20-km thresholds.

Supplementary Table 1. 19 climatic variables used for genomic offset analysis and ecological niche modelling.

| Climatic variables | Definition                                                                                    |
|--------------------|-----------------------------------------------------------------------------------------------|
| BIO1               | Annual mean temperature                                                                       |
| BIO2               | Mean diurnal range (mean of the monthly differences between maximum and minimum temperature ) |
| BIO3               | Isothermality (mean diurnal range/temperature annual range) (*100)                            |
| BIO4               | Temperature seasonality (standard deviation *100)                                             |
| BIO5               | Max temperature of the warmest month                                                          |
| BIO6               | Min temperature of the coldest month                                                          |
| BIO7               | Temperature annual range (BIO5-BIO6)                                                          |
| BIO8               | Mean temperature of the wettest quarter                                                       |
| BIO9               | Mean temperature of the driest quarter                                                        |
| BIO10              | Mean temperature of the warmest quarter                                                       |
| BIO11              | Mean temperature of the coldest quarter                                                       |
| BIO12              | Annual precipitation                                                                          |
| BIO13              | Precipitation of the wettest month                                                            |
| BIO14              | Precipitation of the driest month                                                             |
| BIO15              | Precipitation seasonality (Coefficient of variation)                                          |
| BIO16              | Precipitation of the wettest quarter                                                          |
| BIO17              | Precipitation of the driest quarter                                                           |
| BIO18              | Precipitation of the warmest quarter                                                          |
| BIO19              | Precipitation of the coldest quarter                                                          |



Supplementary Table 2. Rank and cumulative contributions of climatic variables in the GradientForest analysis. Top-ranked uncorrelated variables used for gradientForest analyses are marked by stars. These variables were selected by moving down the list of ranked importance for the full model and discarding variables highly correlated with a variable of higher importance (Pearson's  $r > 0.70$ ).

| <b>Species</b>    | <b>Code</b>          | <b>Definition</b>                   | <b>Cumulative contribution</b> |
|-------------------|----------------------|-------------------------------------|--------------------------------|
| <i>T.elliotii</i> | BIO2*                | Mean diurnal range                  | 8.07%                          |
|                   | BIO3                 | Isothermality                       | 14.61%                         |
|                   | BIO10*               | Mean temperature of warmest quarter | 20.99%                         |
|                   | BIO1                 | Annual mean temperature             | 27.25%                         |
|                   | BIO6                 | Min temperature of coldest month    | 33.31%                         |
|                   | BIO8                 | Mean temperature of wettest quarter | 39.35%                         |
|                   | BIO12                | Annual precipitation                | 45.24%                         |
|                   | BIO16                | Precipitation of wettest quarter    | 50.74%                         |
|                   | BIO11                | Mean temperature of coldest quarter | 56.16%                         |
|                   | BIO13                | Precipitation of wettest month      | 61.31%                         |
|                   | BIO18                | Precipitation of warmest quarter    | 66.23%                         |
|                   | BIO7*                | Temperature annual range            | 71.01%                         |
|                   | BIO9                 | Mean temperature of driest quarter  | 75.78%                         |
|                   | BIO5                 | Max temperature of warmest month    | 80.54%                         |
|                   | BIO19*               | Precipitation of coldest quarter    | 84.81%                         |
|                   | BIO14                | Precipitation of driest month       | 89.08%                         |
|                   | BIO17                | Precipitation of driest quarter     | 93.32%                         |
|                   | BIO4*                | Temperature seasonality             | 96.99%                         |
|                   | BIO15                | Precipitation seasonality           | 100.00%                        |
|                   | <i>P. monticolus</i> | BIO3*                               | Isothermality                  |
| BIO4              |                      | Temperature seasonality             | 16.64%                         |
| BIO18*            |                      | Precipitation of warmest quarter    | 24.54%                         |
| BIO16             |                      | Precipitation of wettest quarter    | 32.03%                         |
| BIO13             |                      | Precipitation of wettest month      | 39.01%                         |
| BIO7              |                      | Temperature annual range            | 45.33%                         |
| BIO15             |                      | Precipitation seasonality           | 50.76%                         |
| BIO12             |                      | Annual precipitation                | 56.11%                         |
| BIO9*             |                      | Mean temperature of driest quarter  | 61.25%                         |
| BIO11             |                      | Mean temperature of coldest quarter | 66.02%                         |
| BIO2              |                      | Mean diurnal range                  | 70.68%                         |
| BIO19*            |                      | Precipitation of coldest quarter    | 74.99%                         |
| BIO5*             |                      | Max temperature of warmest month    | 79.03%                         |
| BIO6              |                      | Min temperature of coldest month    | 83.02%                         |
| BIO1              |                      | Annual mean temperature             | 86.90%                         |
| BIO8              |                      | Mean temperature of wettest quarter | 90.71%                         |
| BIO17             |                      | Precipitation of driest quarter     | 94.14%                         |
| BIO10             |                      | Mean temperature of warmest quarter | 97.52%                         |
| BIO14             |                      | Precipitation of driest month       | 100.00%                        |

Supplementary Table 3. The climate models (MPI-ESM-LR, CCSM4, CNRM-CM5-2 and MICRO-5) and emission scenarios and decades (RCP4.5 2050, RCP8.5 2050, RCP4.5 2070 and RCP8.5 2070) used in the genomic offset analysis and ecological niche modelling.

| Models             | Source                                                                                                                                                              |
|--------------------|---------------------------------------------------------------------------------------------------------------------------------------------------------------------|
| MPI-ESM-LR         | The Max Planck Institute for Meteorology Earth System Model                                                                                                         |
| CCSM4              | The Community Climate System Model Version 4                                                                                                                        |
| CNRM-CM5-2         | Centre National de Recherches M é téorologiques                                                                                                                     |
| MICRO-5            | Model for Interdisciplinary Research on Climate, ver. 3.2;<br><a href="http://www.ccsr.u-tokyo.ac.jp/hasumi/MIROC/">http://www.ccsr.u-tokyo.ac.jp/hasumi/MIROC/</a> |
| Scenarios          | Description                                                                                                                                                         |
| RCP4.5(2050, 2070) | A possible radiative forcing values at 4.5 W/m <sup>2</sup> in the year 2100                                                                                        |
| RCP8.5(2050, 2070) | A possible radiative forcing values at 8.5 W/m <sup>2</sup> in the year 2100                                                                                        |

Supplementary Table 4. 25 and 204 climate-associated SNPs are identified by the three genotype-climate association methods (LFMM, RAD and dbRAD). These SNPs are annotated in the coding sequence and promoter regions (5k upstream and downstream of genes) across 23 and 147 genes for *T. elliotii* and *P. monticolus*, respectively.

| Species              | Genic regions         | SNPs | Proportion |
|----------------------|-----------------------|------|------------|
| <i>T. elliotii</i>   | Coding sequence       | 2    | 8%         |
|                      | Promoter (upstream)   | 17   | 68%        |
|                      | Promoter (downstream) | 6    | 24%        |
|                      | In total              | 25   |            |
| <i>P. monticolus</i> | Coding sequence       | 29   | 14.21%     |
|                      | Promoter (upstream)   | 95   | 46.57%     |
|                      | Promoter (downstream) | 80   | 39.22%     |
|                      | In total              | 204  |            |

Supplementary Table 5. The ecological niche modelling performances for the two species.

| Species              | Datasets                  | AUC   | TSS   |
|----------------------|---------------------------|-------|-------|
| <i>T.elliotii</i>    | Cold-dry tolerant group   | 0.928 | 0.75  |
|                      | Warm-dry tolerant group   | 0.961 | 0.878 |
|                      | Warm-humid tolerant group | 0.964 | 0.859 |
| <i>P. monticolus</i> | Cold-dry tolerant group   | 0.938 | 0.814 |
|                      | Warm-dry tolerant group   | 0.905 | 0.704 |
|                      | Warm-humid tolerant group | 0.904 | 0.71  |

Supplementary Table 6. Modelling results of maximum likelihood population effects (MLPE) of the two species in landscape connectivity analyses. SI, habitat suitability predicted by ecological niche modelling; LC, land cover;  $R_m^2$ , marginal  $R^2$ ;  $R_c^2$ , conditional  $R^2$ .

| Species              | Models                 | AIC   | k     | AICc  | $w_i AIC_c$ | $\Delta AIC_c$ | $R_m^2$ | $R_c^2$ |
|----------------------|------------------------|-------|-------|-------|-------------|----------------|---------|---------|
| <i>T. elliotii</i>   | SI                     | 86.30 | 4     | 86.95 | 0.32        | 0.00           | 0.42    | 0.92    |
|                      | LC+SI                  | 87.97 | 5     | 88.97 | 0.12        | 2.02           | 0.44    | 0.94    |
|                      | slope+SI               | 88.22 | 5     | 89.22 | 0.10        | 2.26           | 0.38    | 0.91    |
|                      | elevation+ST           | 88.22 | 5     | 89.22 | 0.10        | 2.27           | 0.39    | 0.92    |
|                      | Elevation              | 88.90 | 4     | 89.56 | 0.09        | 2.60           | 0.21    | 0.89    |
|                      | Slope                  | 90.13 | 4     | 90.78 | 0.05        | 3.83           | 0.10    | 0.88    |
|                      | LC+elevation+SI        | 89.60 | 6     | 91.02 | 0.04        | 4.07           | 0.37    | 0.93    |
|                      | LC+slope+SI            | 89.80 | 6     | 91.23 | 0.04        | 4.27           | 0.39    | 0.93    |
|                      | LC+elevation           | 90.46 | 5     | 91.46 | 0.03        | 4.51           | 0.17    | 0.90    |
|                      | elevation+elevation+SI | 90.21 | 6     | 91.63 | 0.03        | 4.68           | 0.37    | 0.92    |
|                      | slope+elevation        | 90.86 | 5     | 91.86 | 0.03        | 4.91           | 0.18    | 0.89    |
|                      | LC+slope               | 92.11 | 5     | 93.11 | 0.01        | 6.16           | 0.09    | 0.89    |
|                      | LC+elevation+slope+SI  | 91.59 | 7     | 93.52 | 0.01        | 6.57           | 0.38    | 0.94    |
|                      | LC+slope+elevation     | 92.46 | 6     | 93.88 | 0.01        | 6.93           | 0.17    | 0.91    |
| LC                   | 96.22                  | 4     | 96.87 | 0.00  | 9.92        | 0.35           | 0.90    |         |
| <i>P. monticolus</i> | elevation+SI           | 28.38 | 5     | 29.92 | 0.37        | 0.00           | 0.57    | 0.94    |
|                      | Elevation              | 29.52 | 4     | 30.52 | 0.27        | 0.60           | 0.23    | 0.92    |
|                      | LC+elevation+SI        | 29.43 | 6     | 31.64 | 0.16        | 1.71           | 0.59    | 0.94    |
|                      | LC+elevation           | 31.27 | 5     | 32.81 | 0.09        | 2.89           | 0.24    | 0.93    |
|                      | LC                     | 32.61 | 4     | 33.61 | 0.06        | 3.69           | 0.33    | 0.95    |
|                      | SI                     | 33.43 | 4     | 34.43 | 0.04        | 4.51           | 0.10    | 0.94    |
|                      | LC+SI                  | 33.97 | 5     | 35.51 | 0.02        | 5.59           | 0.21    | 0.94    |

Supplementary Table 7. Model selection using Fastsimcoal v2.6 and Akaike information criterion (AIC). Bold shows the best models supported by  $\Delta$ AIC and AIC's weight.

| Species                        | Models                                | MaxEstLhood        | AIC               | $\Delta$ AIC | AIC's weight (W) |
|--------------------------------|---------------------------------------|--------------------|-------------------|--------------|------------------|
| <i>T. elliotii</i>             |                                       |                    |                   |              |                  |
| Cold-dry vs. warm-dry groups   | Non gene flow model (M1)              | -10816746.0        | 49812964.1        | 4853.65      | 0                |
|                                | <b>Secondary gene flow model (M2)</b> | <b>-10806207.9</b> | <b>49764440.5</b> | <b>0</b>     | <b>1</b>         |
|                                | Continuous gene flow model (M3)       | -10807626.4        | 49770970.8        | 6530.30      | 0                |
| Cold-dry vs. warm-humid groups | Non gene flow model (M1)              | -10957339.6        | 50460421.6        | 54208.6      | 0                |
|                                | <b>Secondary gene flow model (M2)</b> | <b>-10945567.0</b> | <b>50406213.0</b> | <b>0</b>     | <b>1</b>         |
|                                | Continuous gene flow model (M3)       | -10947247.4        | 50413949.2        | 7736.3       | 0                |
| Cold-dry vs. warm-humid groups | Non gene flow model (M1)              | -10910021.9        | 50242515.7        | 48885.7      | 0                |
|                                | <b>Secondary gene flow model (M2)</b> | <b>-10899405.2</b> | <b>50193630.1</b> | <b>0</b>     | <b>1</b>         |
|                                | Continuous gene flow model (M3)       | -10902037.3        | 50205749.2        | 12119.1      | 0                |
| <i>P. monticolus</i>           |                                       |                    |                   |              |                  |
| Cold-dry vs. warm-dry groups   | Non gene flow model (M1)              | -7569384.5         | 34858311.7        | 346232.9     | 0                |
|                                | <b>Secondary gene flow model (M2)</b> | <b>-7494199.7</b>  | <b>34512078.9</b> | <b>0</b>     | <b>1</b>         |
|                                | Continuous gene flow model (M3)       | -7499413.2         | 34536086.7        | 24007.8      | 0                |
| Cold-dry vs. warm-humid groups | Non gene flow model (M1)              | -7410043.0         | 34124517.1        | 397440.2     | 0                |
|                                | <b>Secondary gene flow model (M2)</b> | <b>-7323738.6</b>  | <b>33727076.9</b> | <b>0</b>     | <b>1</b>         |
|                                | Continuous gene flow model (M3)       | -7327639.9         | 33745040.7        | 17963.9      | 0                |
| Cold-dry vs. warm-humid groups | Non gene flow model (M1)              | -7140412.0         | 32882820.3        | 391217.2     | 0                |
|                                | <b>Secondary gene flow model (M2)</b> | <b>-7055458.9</b>  | <b>32491603.1</b> | <b>0</b>     | <b>1</b>         |
|                                | Continuous gene flow model (M3)       | -7057596.0         | 32501442.4        | 9839.3       | 0                |

Supplementary Table 8. Parameter estimates under the best-fit demographic model (M2, secondary gene flow). All estimates assume an one-year generation time and a mutation rate of  $3.3e^{-9}$  per site per generation. Point estimates are provided with 95% confidence intervals in parentheses.  $m$ , migration probabilities (or, the probability that any gene from one lineage transfers to another on a per generation basis).

| Demographic model                                  | Paramet | Description                              | Estimate values                               |
|----------------------------------------------------|---------|------------------------------------------|-----------------------------------------------|
| <i>T. elliotii</i>                                 |         |                                          |                                               |
| Cold-dry tolerant vs. warm-dry tolerant lineages   | T1      | Split time between lineages              | 27,871 (22,639-33,103)                        |
|                                                    | T2      | Admixture time                           | 16,310 (11,197-21,423)                        |
|                                                    | MIG12   | $m$ from warm-dry to cold-dry lineages   | $1.76e^{-3}$ ( $2.02e^{-05}$ - $3.35e^{-3}$ ) |
|                                                    | MIG21   | $m$ from cold-dry to warm-dry lineages   | $6.69e^{-6}$ ( $3.2e^{-06}$ - $1.02e^{-5}$ )  |
| Cold-dry tolerant vs. warm-humid tolerant lineages | T1      | Split time between lineages              | 32,165 (38,905-68,596)                        |
|                                                    | T2      | Admixture time                           | 17,524 (10,062-24,986)                        |
|                                                    | MIG12   | $m$ from warm-dry to cold-dry lineages   | $3.07e^{-3}$ ( $0-6.2e^{-3}$ )                |
|                                                    | MIG21   | $m$ from cold-dry to warm-dry lineages   | $7.69e^{-5}$ ( $5.99e^{-06}$ - $1.48e^{-4}$ ) |
| Warm-dry tolerant vs. warm-humid tolerant lineages | T1      | Split time between lineages              | 27,429 (19,868-34,990)                        |
|                                                    | T2      | Admixture time                           | 13,260 (8,961-17,559)                         |
|                                                    | MIG12   | $m$ from warm-humid to warm-dry lineages | $3.08e^{-4}$ ( $9.57e^{-05}$ - $5.2e^{-4}$ )  |
|                                                    | MIG21   | $m$ from warm-dry to warm-humid lineages | $8.89e^{-6}$ ( $1.46e^{-06}$ - $1.63e^{-5}$ ) |
| <i>P. monticolus</i>                               |         |                                          |                                               |
| Cold-dry tolerant vs. warm-dry tolerant lineages   | T1      | Split time between lineages              | 85,965 (69,152-102,778)                       |
|                                                    | T2      | Admixture time                           | 12,807 (9,654-15,960)                         |
|                                                    | MIG12   | $m$ from warm-dry to cold-dry lineages   | $2.04e^{-4}$ ( $9.33e^{-05}$ - $3.15e^{-4}$ ) |
|                                                    | MIG21   | $m$ from cold-dry to warm-dry lineages   | $1.06e^{-4}$ ( $7.39e^{-05}$ - $1.38e^{-4}$ ) |
| Cold-dry tolerant vs. warm-humid tolerant lineages | T1      | Split time between lineages              | 86,298 (75,803-96,793)                        |
|                                                    | T2      | Admixture time                           | 11,474 (10,023-12,924)                        |
|                                                    | MIG12   | $m$ from warm-dry to cold-dry lineages   | $7.56e^{-5}$ ( $6.29e^{-05}$ - $8.83e^{-5}$ ) |
|                                                    | MIG21   | $m$ from cold-dry to warm-dry lineages   | $1.10e^{-4}$ ( $8.30e^{-05}$ - $1.37e^{-4}$ ) |
| Warm-dry tolerant vs. warm-humid tolerant lineages | T1      | Split time between lineages              | 47,601(34,921-60,283)                         |
|                                                    | T2      | Admixture time                           | 16,839 (10,941-22,737)                        |
|                                                    | MIG12   | $m$ from warm-humid to warm-dry lineages | $1.35e^{-3}$ ( $8.46e^{-04}$ - $1.86e^{-4}$ ) |
|                                                    | MIG21   | $m$ from warm-dry to warm-humid lineages | $2.34e^{-4}$ ( $1.08e^{-4}$ - $3.61e^{-4}$ )  |

Supplementary Table 9. The climatic variables used for ecological niche modelling.

| Species              | Group                   | Climatic variables used in ecological niche modelling |
|----------------------|-------------------------|-------------------------------------------------------|
| <i>T. elliotii</i>   | Cold-dry tolerant group | BIO2, BIO3, BIO8, BIO15                               |
|                      | Warm-dry tolerant group | BIO2, BIO3, BIO8, BIO13, BIO19                        |
|                      | Warm-humid group        | BIO2, BIO4, BIO14, BIO15, BIO18                       |
| <i>P. monticolus</i> | Cold-dry tolerant group | BIO2, BIO9, BIO14, BIO15, BIO18                       |
|                      | Warm-dry tolerant group | BIO3, BIO4, BIO8, BIO13, BIO15                        |
|                      | Warm-humid group        | BIO2, BIO3, BIO4, BIO8, BIO15, BIO18, BIO19           |



Supplementary Table 10. Sensitivity analyses of different assignments of resistance costs to habitat types in the land cover.  $R_m^2$ , marginal  $R^2$ ;  $R_c^2$ , conditional  $R^2$ .

| Resistance costs      | $R_m^2/R_c^2$ of <i>T.elliottii</i> | $R_m^2/R_c^2$ of <i>P. monticolus</i> |
|-----------------------|-------------------------------------|---------------------------------------|
| Forest=1              | 0.355/0.904                         | 0.325/0.951                           |
| Shrublands=1          |                                     |                                       |
| Grasslands=1          |                                     |                                       |
| Savannas=3            |                                     |                                       |
| Croplands=5           |                                     |                                       |
| Barren or Sparsely    |                                     |                                       |
| Vegetated=7           |                                     |                                       |
| Water=10              |                                     |                                       |
| Urban and Built-Up=10 |                                     |                                       |
| Forest=1              | 0.354/0.904                         | 0.321/0.952                           |
| Shrublands=1          |                                     |                                       |
| Grasslands=1          |                                     |                                       |
| Savannas=4            |                                     |                                       |
| Croplands=5           |                                     |                                       |
| Barren or Sparsely    |                                     |                                       |
| Vegetated=9           |                                     |                                       |
| Water=10              |                                     |                                       |
| Urban and Built-Up=10 |                                     |                                       |
| Forest=1              | 0.344/0.902                         | 0.315/0.947                           |
| Shrublands=2          |                                     |                                       |
| Grasslands=1          |                                     |                                       |
| Savannas=4            |                                     |                                       |
| Croplands=5           |                                     |                                       |
| Barren or Sparsely    |                                     |                                       |
| Vegetated=8           |                                     |                                       |
| Water=10              |                                     |                                       |
| Urban and Built-Up=10 |                                     |                                       |
| Forest=10             | 0.157/0.888                         | 0.05/0.934                            |
| Shrublands=10         |                                     |                                       |
| Grasslands=10         |                                     |                                       |
| Savannas=7            |                                     |                                       |
| Croplands=5           |                                     |                                       |
| Barren or Sparsely    |                                     |                                       |
| Vegetated=3           |                                     |                                       |
| Water=1               |                                     |                                       |
| Urban and Built-Up=1  |                                     |                                       |
